# Supplementary material for: Oxalate-assisted Fe 2 O 3 surface functionalization of nanosized MgMn 2 O 4 and α-MnO 2 cathodes for rechargeable magnesium batteries
Source: Royal Society of Chemistry journal article supplement (doi:10.1039/d4lf00290c), 2024-10-31
Supplement: d4lf00290c1.pdf [file d4lf00290c1.pdf]

## Electronic Supplementary information

# Oxalate-assisted Fe<sub>2</sub>O<sub>3</sub> surface functionalization of nanosized MgMn<sub>2</sub>O<sub>4</sub> and α-MnO<sub>2</sub> cathodes for rechargeable magnesium batteries

*Masanao Ishijima,<sup>a\*</sup> Arisa Omata,<sup>a</sup> Kiyoshi Kanamura,<sup>a</sup> Toshihiko Mandai,<sup>b</sup> Xiatong Ye,<sup>c</sup>  
Tetsu Ichitsubo,<sup>c</sup> and Koichi Kajihara<sup>a\*</sup>*

*a* Department of Applied Chemistry for Environment, Graduate School of Urban Environmental Sciences, Tokyo Metropolitan University, Hachioji, Tokyo 192-0397, Japan

*b* Research Center for Energy and Environmental Materials (GREEN), National Institute for Materials Science (NIMS), 1-1 Namiki, Tsukuba, Ibaraki 305-0044, Japan

*c* Institute for Materials Research, Tohoku University, Sendai 980-8577, Japan.

\*Corresponding author

Masanao Ishijima, Email: [ishijima@tmu.ac.jp](mailto:ishijima@tmu.ac.jp)

Koichi Kajihara, Email: [kkaji@tmu.ac.jp](mailto:kkaji@tmu.ac.jp)

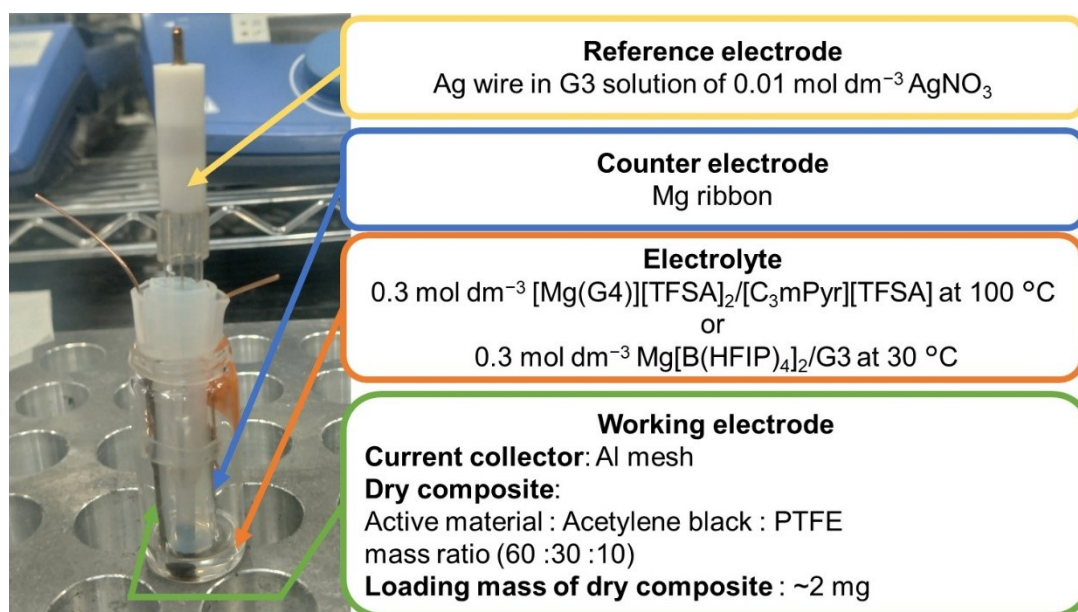

Fig. S1 Photograph of a three-electrode cell for electrochemical measurements.

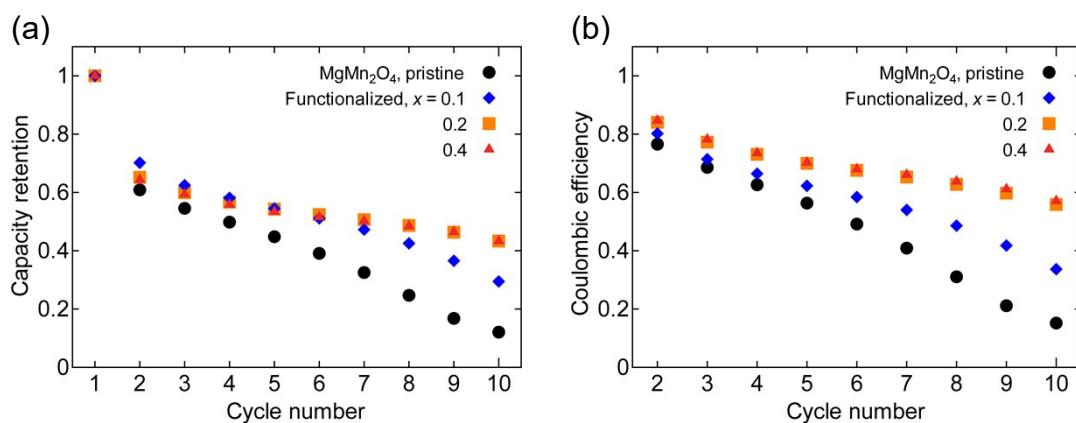

Fig. S2 (a) Capacity retention and (b) Coulombic efficiency of dry composite cathodes of pristine and Fe<sub>2</sub>O<sub>3</sub>-functionalized MgMn<sub>2</sub>O<sub>4</sub> in 0.3 mol dm<sup>-3</sup> [Mg(G4)][TFSA]<sub>2</sub>/[C<sub>3</sub>mPyr][TFSA] at 100 °C.

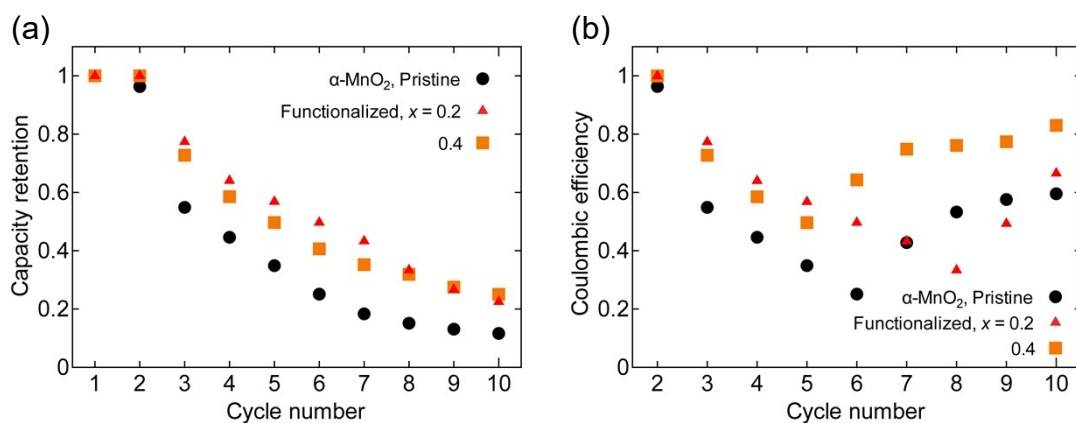

Fig. S3 (a) Capacity retention and (b) Coulombic efficiency of dry composite cathodes of pristine and Fe<sub>2</sub>O<sub>3</sub>-functionalized α-MnO<sub>2</sub> in 0.3 mol dm<sup>-3</sup> [Mg(G4)][TFSA]<sub>2</sub>/[C<sub>3</sub>mPyr][TFSA] at 100 °C.

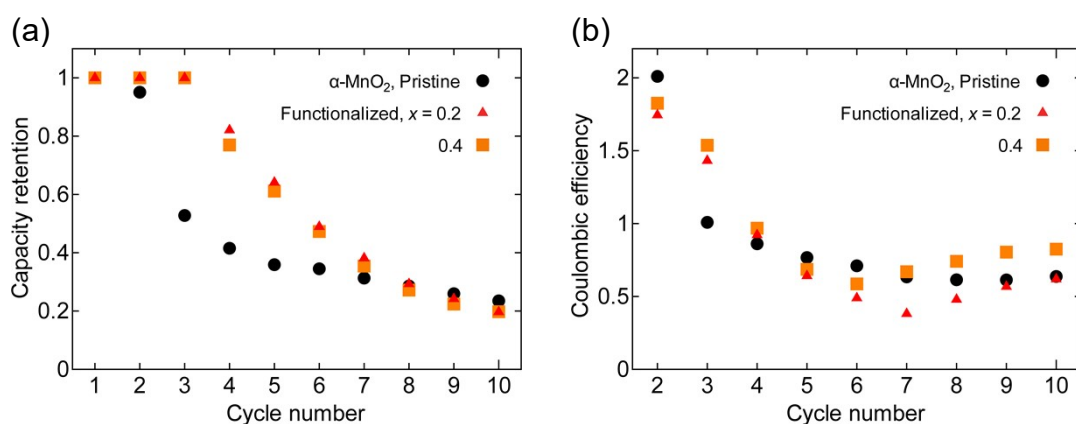

Fig. S4 (a) Capacity retention and (b) Coulombic efficiency of dry composite cathodes of pristine and Fe<sub>2</sub>O<sub>3</sub>-functionalized α-MnO<sub>2</sub> with in 0.3 mol dm<sup>-3</sup> Mg[B(HFIP)<sub>4</sub>]<sub>2</sub>/G3 at 30 °C.
